# Supplementary material for: Fast and reversible photo-responsive wettability on TiO2 based hybrid surfaces
Source: Royal Society of Chemistry journal article supplement (doi:10.1039/c5ta01710f), 2015-01-01
Supplement: c5ta01710f1.pdf [file c5ta01710f1.pdf]

## Fast and Reversible Photo-Responsive Wettability on TiO<sub>2</sub> based hybrid surfaces

Gwendoline Petroffe, Chao Wang, Xavier Sallenave,  
Gjergji Sini, Fabrice Goubard, and Sébastien Péralta

### Electronic Supplementary information (ESI)

#### I Theoretical absorption spectra of *Trans*- and *Cis*-AzoC11 acid in THF

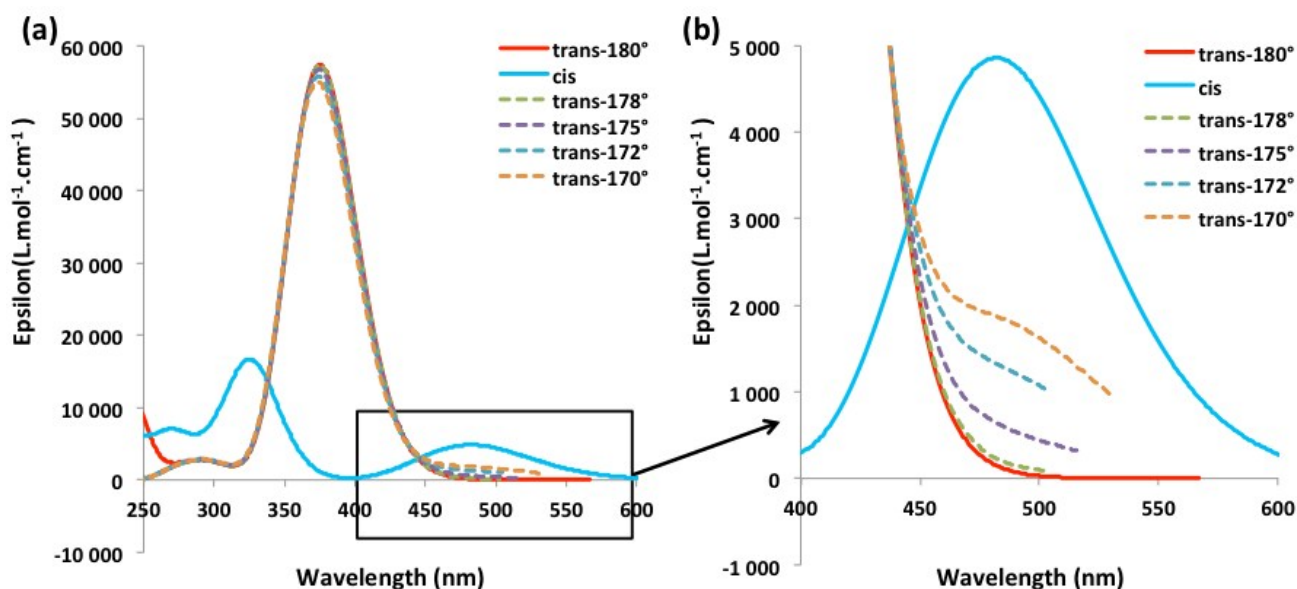

**Figure S1:** Theoretical absorption spectra of *Trans*- and *Cis*-AzoC11 acid in THF. Compared to the perfectly planar *Trans*-isomer (indicated as *Trans*-180°), small deformations from the planarity around the N=N bond are simulated and reported as *Trans*-180°, 178°, 175°, 172° and 170°. The *n*→ $\pi$  transition at 500 nm, which is forbidden for *Trans*-180° (red plot) is shown to become less forbidden with deviation from  $\pi$ -backbone planarity.

## II Absorption onset on the UV-Vis spectra

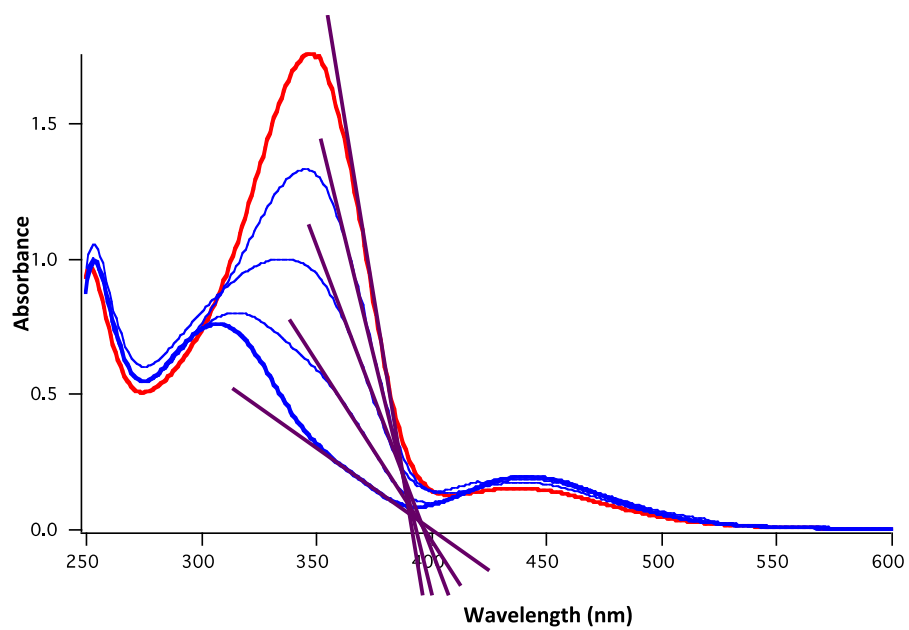

**Figure S2:** Absorption onset on the UV-Vis spectra of AzoC11 acid solution

### III Theoretical estimation of molecular-areas.

Considering the maximum distances along the two short-axes directions (1.8Åx7.3 Å and 5.1Åx5.6Å respectively for the *Trans*- and *Cis*-isomers), and by adding one hydrogen van der Waals radii (1.2 Å) to each dimension, molecular areas of roughly 0.26 nm<sup>2</sup> and 0.43 nm<sup>2</sup> respectively can be deduced. While being close to the experimental results, the theoretical values correspond to pure *Trans*- and *Cis* isomers. However, small mixing cannot be excluded in the *Cis*- experimental state as suggested by the absorption spectra in THF. By arbitrary considering the value of 5-10 % of *Trans*-mixing in the *Cis*-isomer after UV irradiation, effective molecular area of 41-42 nm<sup>2</sup> can be found for the *Cis*-isomer, in good agreement with the experimental result.

### IV Expression of surface ratio

The surface ratio of the AzoC11 acid on the nanoparticles was estimated with this following relation:

$$\text{Surface ratio} = \frac{\text{Area}_{\text{AzoC11 acid}} \times N_a \times \frac{m_{\text{AzoC11 acid}}}{M_{\text{AzoC11 acid}}}}{\text{Area}_{\text{TiO}_2} \times m_{\text{TiO}_2}}$$

The numerator represented the total area of the AzoC11 acid molecules and the denominator represented total area of the nanoparticles.

Area<sub>AzoC11 acid</sub>: area molecular of the AzoC11 acid,

N<sub>a</sub>: Avogadro constant,

m<sub>AzoC11 acid</sub>: weight of the AzoC11 acid,

M<sub>AzoC11 acid</sub>: Molar weight of the AzoC11 acid,

Area<sub>TiO2</sub>: specific area of TiO<sub>2</sub> nanoparticles P25 (55 m<sup>2</sup>/g),

m<sub>TiO2</sub>: weight of TiO<sub>2</sub> nanoparticles.

### V values of wetting study

| Surface Ratio                            | 0%   | 39%        | 62%         | 77%         | 116%        | 193%        |
|------------------------------------------|------|------------|-------------|-------------|-------------|-------------|
| θ <sub>init</sub>                        | <10° | 26.7°±2.7° | 136.7°±2.4° | 146.0°±2.1° | 152.8°±3.4° | 156.5°±2.4° |
| θ <sub>after UV</sub>                    | <10° | <10°       | 35.9°±3.4°  | 21.2°±3.9°  | 117.2°±2.1° | 139.6°±1.8° |
| θ <sub>init</sub> -θ <sub>after UV</sub> | 0°   | 16.7°±2.7° | 100.8°±5.8° | 124.8°±6.0° | 35.6°±5.5°  | 16.9°±4.2°  |

**Table S1:** Initial water contact-angle, contact angle after 12 min of UV irradiation and the variation of the contact angles between before- and after the UV irradiation

## VI Comparison of contact angle variations versus the irradiation conditions

The following table reports some results in the literature concerning the contact angle variations ( $\Delta\theta^\circ$ ) and irradiation conditions.

| $\Delta\theta^\circ$ | The power of the UV source | Irradiation Time | References        |
|----------------------|----------------------------|------------------|-------------------|
| 12°                  | 25 Watt                    | 5 min            | 1                 |
| 50°                  | 10 Watt                    | 60 min           | 2                 |
| 121°                 | 8 Watt                     | 13 hours         | 3                 |
| <b>124°</b>          | <b>15 Watt</b>             | <b>12 min</b>    | <b>This study</b> |
| 138°                 | 300 Watt                   | 10 min           | 4                 |
| 156°                 | 150 Watt                   | 2 hours          | 5                 |

**Table S2:** Contact angle variations versus the irradiation conditions

## References

1. D. Yang, M. Piech, N. S. Bell, D. Gust, S. Vail, A. a Garcia, J. Schneider, C.-D. Park, M. a Hayes, and S. T. Picraux, *Langmuir*, 2007, **23**, 10864–10872.
2. M. Miyauchi, N. Kieda, S. Hishita, T. Mitsuhashi, A. Nakajima, T. Watanabe, and K. Hashimoto, *Surf. Sci.*, 2002, **511**, 401–407.
3. C. Jin, R. Yan, and J. Huang, *J. Mater. Chem.*, 2011, **21**, 17519–17525.
4. H. S. Lim, J. T. Han, D. Kwak, M. Jin, and K. Cho, *J. Am. Chem. Soc.*, 2006, **128**, 14458–14459.
5. W. Sun, S. Zhou, B. You, and L. Wu, *J. Mater. Chem. A*, 2013, **1**, 3146–3154.
